# Supplementary material for: Poria cocos oligosaccharides ameliorate dextran sodium sulfate-induced colitis mice by regulating gut microbiota dysbiosis
Source: Royal Society of Chemistry journal article supplement (doi:10.1039/d2fo03424g), 2022-12-20
Supplement: d2fo03424g1.pdf [file d2fo03424g1.pdf]

1

## Supplementary data

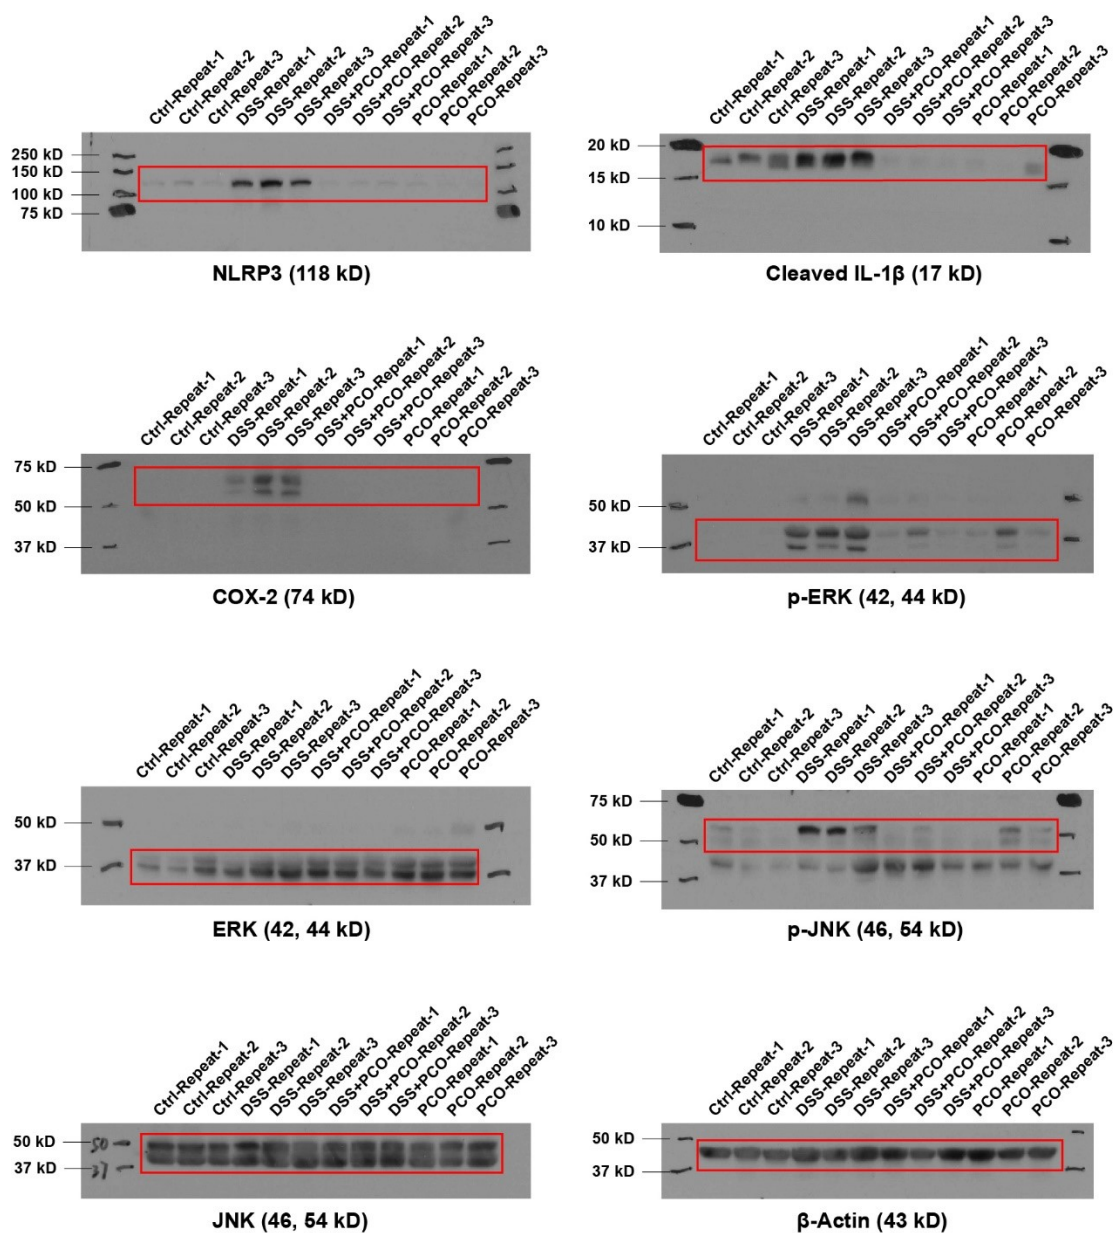

2

3       Uncropped images of original Western blots. Uncropped Western blot results of  
4 gut tissues were provided, including NLRP3, Cleaved IL-1β, COX-2, p-ERK, ERK,  
5 p-JNK, JNK, and β-actin.

6
